# Supplementary material for: Experimental test of Babinet's principle in matter-wave diffraction
Source: Royal Society of Chemistry journal article supplement (doi:10.1039/d0cp05694d), 2021-01-01
Supplement: d0cp05694d2.pdf [file d0cp05694d2.pdf]

[d = 400 μm, a = 10 μm]

a = 10 μm: 1/17

Efficiency,  $e_n$

[d = 400 μm, a = 10 μm]

| Incidence angle, $\theta_{in}$<br>[mrad] | $n = -2$          | $n = -1$  |
|------------------------------------------|-------------------|-----------|
|                                          | Efficiency, $e_n$ |           |
| 0.44455429                               | 0                 | 0         |
| 0.467733971                              | 0                 | 0         |
| 0.489439925                              | 0                 | 0         |
| 0.513603484                              | 0                 | 0         |
| 0.521969496                              | 0                 | 0         |
| 0.556171333                              | 0                 | 0         |
| 0.580286582                              | 0                 | 0         |
| 0.603940127                              | 0                 | 0         |
| 0.624900228                              | 0                 | 0         |
| 0.638450051                              | 0                 | 0         |
| 0.67374614                               | 0                 | 0         |
| 0.697633592                              | 0                 | 0         |
| 0.722611166                              | 0                 | 0         |
| 0.747248217                              | 0                 | 0         |
| 0.759081164                              | 0                 | 0         |
| 0.795048872                              | 0                 | 0.0001298 |
| 0.827135716                              | 0                 | 0.0076575 |
| 0.848670285                              | 0                 | 0.0100503 |
| 0.870993008                              | 0                 | 0.0094601 |
| 0.883915077                              | 0                 | 0.0086178 |
| 0.92131939                               | 0                 | 0.00664   |
| 0.944708347                              | 0                 | 0.0054257 |
| 0.968500419                              | 0                 | 0.0044608 |
| 0.984135576                              | 0                 | 0.003682  |
| 1.007133558                              | 0                 | 0.0032158 |
| 1.039825403                              | 0                 | 0.0021169 |
| 1.068124781                              | 0                 | 0.0016019 |
| 1.093339214                              | 0                 | 0.0011329 |
| 1.117159453                              | 0                 | 0.0008061 |
| 1.123311245                              | 0                 | 0.0007408 |
| 1.140996256                              | 0.000111535       | 0.0006119 |
| 1.184838437                              | 0.004972168       | 0.0009333 |
| 1.208087064                              | 0.004762805       | 0.0010112 |
| 1.234183747                              | 0.003741442       | 0.0010082 |
| 1.255257409                              | 0.002979169       | 0.0009085 |
| 1.272257422                              | 0.002273271       | 0.0007571 |
| 1.280779202                              | 0.00200402        | 0.0007604 |
| 1.317241372                              | 0.0014088         | 0.0005759 |
| 1.343115034                              | 0.001008263       | 0.0004637 |
| 1.36787399                               | 0.000705071       | 0.0003524 |

[d = 400  $\mu\text{m}$ , a = 10  $\mu\text{m}$ ]

a = 10  $\mu\text{m}$ : 2/17

Efficiency,  $e_n$

|             |             |           |
|-------------|-------------|-----------|
| 1.391944918 | 0.000499688 | 0.0003072 |
| 1.41866558  | 0.000466356 | 0.0002537 |
| 1.425855813 | 0.000492137 | 0.0002774 |
| 1.450218775 | 0.000667225 | 0.0003805 |
| 1.48628723  | 0.000640732 | 0.0003597 |
| 1.509288932 | 0.000541486 | 0.0002666 |
| 1.533135442 | 0.000501381 | 0.0002868 |
| 1.562883151 | 0.000398217 | 0.0002646 |
| 1.563251423 | 0.000357773 | 0.0002269 |
| 1.598322266 | 0.000276821 | 0.0001943 |
| 1.641621218 | 0.000145276 | 9.399E-05 |
| 1.665188308 | 0.000290246 | 0.0001912 |
| 1.690065377 | 0.000283257 | 0.0001799 |
| 1.685824094 | 0.000276676 | 0.0001618 |
| 1.740734539 | 0.000253812 | 0.0001494 |
| 1.766543576 | 0.000208186 | 0.0001351 |
| 1.777051815 | 0.000154107 | 0.0001013 |
| 1.802076052 | 0.000162449 | 0.0001011 |
| 1.845703084 | 0.000140752 | 0.000108  |
| 1.868411643 | 0.000141969 | 0.0001068 |
| 1.870014808 | 0.000141987 | 0.0001036 |
| 1.905846276 | 0.000147488 | 8.758E-05 |
| 1.938824386 | 0.000143046 | 6.664E-05 |
| 1.961145507 | 9.07378E-05 | 6.64E-05  |
| 1.966588315 | 8.49554E-05 | 5.508E-05 |
| 2.027910167 | 5.27615E-05 | 4.663E-05 |
| 2.033337315 | 8.90379E-05 | 4.446E-05 |
| 2.041844502 | 6.61881E-05 | 4.899E-05 |
| 2.082182933 | 7.24876E-05 | 3.013E-05 |
| 2.102419293 | 6.7246E-05  | 3.859E-05 |
| 2.133628115 | 5.6969E-05  | 2.885E-05 |
| 2.183619475 | 3.63576E-05 | 2.214E-05 |
| 2.209530302 | 5.30863E-05 | 3.808E-05 |

---

[d = 400 μm, a = 30 μm]

a = 30 μm: 3/17

Efficiency,  $e_n$

[d = 400 μm, a = 30 μm]

| Incidence angle, $\theta_{in}$<br>[mrad] | $n = -2$          | $n = -1$  |
|------------------------------------------|-------------------|-----------|
|                                          | Efficiency, $e_n$ |           |
| 0.456583713                              | 0                 | 0         |
| 0.480893916                              | 0                 | 0         |
| 0.503695615                              | 0                 | 0         |
| 0.525155476                              | 0                 | 0         |
| 0.549563114                              | 0                 | 0         |
| 0.572552936                              | 0                 | 0         |
| 0.593667808                              | 0                 | 0         |
| 0.61705282                               | 0                 | 0         |
| 0.637470437                              | 0                 | 0         |
| 0.662789015                              | 0                 | 0         |
| 0.687877749                              | 0                 | 0         |
| 0.711789689                              | 0                 | 0         |
| 0.733865099                              | 0                 | 0         |
| 0.753780276                              | 0                 | 0         |
| 0.786832969                              | 0                 | 1.96E-04  |
| 0.816456869                              | 0                 | 0.0061893 |
| 0.837990576                              | 0                 | 0.0165487 |
| 0.862079379                              | 0                 | 0.0179426 |
| 0.880383783                              | 0                 | 0.0171499 |
| 0.901611746                              | 0                 | 0.0151109 |
| 0.93290722                               | 0                 | 0.0122908 |
| 0.955188299                              | 0                 | 0.0107066 |
| 0.977990842                              | 0                 | 0.0092813 |
| 1.002913863                              | 0                 | 0.007665  |
| 1.018013741                              | 0                 | 0.0067518 |
| 1.052561493                              | 0                 | 0.0047362 |
| 1.074574688                              | 0                 | 0.0038494 |
| 1.099948728                              | 0                 | 0.0029574 |
| 1.121370303                              | 0                 | 0.0023548 |
| 1.136993126                              | 3.17E-04          | 0.0020119 |
| 1.173734263                              | 0.007509309       | 0.0022855 |
| 1.197403881                              | 0.009630976       | 0.0028388 |
| 1.221184953                              | 0.008828938       | 0.0030078 |
| 1.245604518                              | 0.007744286       | 0.0029319 |
| 1.25764057                               | 0.007033126       | 0.0028822 |
| 1.272770304                              | 0.006055245       | 0.0027628 |
| 1.300292866                              | 0.004617425       | 0.0023974 |
| 1.322588942                              | 0.003681187       | 0.0021596 |
| 1.344497059                              | 0.002904978       | 0.0018482 |
| 1.357955162                              | 0.002494093       | 0.0016911 |

[d = 400  $\mu\text{m}$ , a = 30  $\mu\text{m}$ ]

a = 30  $\mu\text{m}$ : 4/17

Efficiency,  $e_n$

|             |             |           |
|-------------|-------------|-----------|
| 1.391120377 | 0.001706651 | 0.0012611 |
| 1.420372511 | 0.001507757 | 0.0012201 |
| 1.44229613  | 0.001890883 | 0.0013839 |
| 1.460977729 | 0.002132069 | 0.0015916 |
| 1.48534399  | 0.002156305 | 0.0016883 |
| 1.513501505 | 0.002045852 | 0.0015046 |
| 1.539217801 | 0.00187213  | 0.0014578 |
| 1.558278592 | 0.001702671 | 0.0012979 |
| 1.569630266 | 0.001569406 | 0.001247  |
| 1.606000826 | 0.001180834 | 9.23E-04  |
| 1.634725213 | 9.94E-04    | 8.23E-04  |
| 1.662478659 | 0.0011225   | 9.44E-04  |
| 1.683199545 | 0.001251475 | 0.0010514 |
| 1.707128342 | 0.00123515  | 0.0010552 |
| 1.739922521 | 0.001220997 | 0.001013  |
| 1.764461046 | 0.001153955 | 9.34E-04  |
| 1.786517604 | 0.001028809 | 7.89E-04  |
| 1.801216889 | 9.15E-04    | 8.16E-04  |
| 1.819991545 | 7.74E-04    | 5.60E-04  |
| 1.844710751 | 7.32E-04    | 6.32E-04  |
| 1.869255594 | 8.73E-04    | 6.85E-04  |
| 1.895330049 | 8.90E-04    | 7.36E-04  |
| 1.922154    | 8.45E-04    | 7.37E-04  |
| 1.948273821 | 8.27E-04    | 5.60E-04  |
| 1.9696699   | 7.22E-04    | 7.00E-04  |
| 1.993908361 | 7.30E-04    | 5.07E-04  |
| 2.027560491 | 4.64E-04    | 3.73E-04  |
| 2.052102879 | 5.37E-04    | 4.11E-04  |
| 2.07770215  | 5.35E-04    | 3.55E-04  |

---

[d = 400  $\mu\text{m}$ , a = 70  $\mu\text{m}$ ]a = 70  $\mu\text{m}$ : 5/17Efficiency,  $e_n$ [d = 400  $\mu\text{m}$ , a = 70  $\mu\text{m}$ ]

| Incidence angle, $\theta_{\text{in}}$<br>[mrad] | $n = -2$          | $n = -1$  |
|-------------------------------------------------|-------------------|-----------|
|                                                 | Efficiency, $e_n$ |           |
| 0.450157043                                     | 0                 | 0         |
| 0.476848569                                     | 0                 | 0         |
| 0.501245821                                     | 0                 | 0         |
| 0.524889665                                     | 0                 | 0         |
| 0.549472327                                     | 0                 | 0         |
| 0.571624303                                     | 0                 | 0         |
| 0.594024874                                     | 0                 | 0         |
| 0.61056388                                      | 0                 | 0         |
| 0.641607085                                     | 0                 | 0         |
| 0.665335164                                     | 0                 | 0         |
| 0.687963609                                     | 0                 | 0         |
| 0.711854682                                     | 0                 | 0         |
| 0.73229399                                      | 0                 | 0         |
| 0.765641296                                     | 0                 | 0         |
| 0.791370726                                     | 0                 | 3.63E-04  |
| 0.820423648                                     | 0                 | 0.0069792 |
| 0.844663324                                     | 0                 | 0.021142  |
| 0.86255551                                      | 0                 | 0.0259456 |
| 0.898358811                                     | 0                 | 0.0246556 |
| 0.923197054                                     | 0                 | 0.0220992 |
| 0.946485839                                     | 0                 | 0.0211659 |
| 0.969420362                                     | 0                 | 0.0200619 |
| 0.984233639                                     | 0                 | 0.0205008 |
| 1.009710682                                     | 0                 | 0.0186824 |
| 1.042056011                                     | 0                 | 0.014361  |
| 1.066524143                                     | 0                 | 0.0123515 |
| 1.090186825                                     | 0                 | 0.0103668 |
| 1.111620985                                     | 0                 | 0.0090923 |
| 1.127136044                                     | 0                 | 0.0079898 |
| 1.167413745                                     | 5.04E-03          | 0.0058725 |
| 1.191797256                                     | 0.011419792       | 0.0068585 |
| 1.214123532                                     | 0.013129514       | 0.0077393 |
| 1.234497359                                     | 0.013309278       | 0.0084309 |
| 1.249491423                                     | 0.013288047       | 0.0087494 |
| 1.287333013                                     | 0.011132499       | 0.0085724 |
| 1.311681276                                     | 0.009706747       | 0.0083986 |
| 1.337370561                                     | 0.008618099       | 0.008037  |
| 1.360846112                                     | 0.007409022       | 0.0076263 |
| 1.371450045                                     | 0.006851265       | 0.0073199 |
| 1.398342116                                     | 0.00543235        | 0.0063606 |

[d = 400  $\mu\text{m}$ , a = 70  $\mu\text{m}$ ]

a = 70  $\mu\text{m}$ : 6/17

Efficiency,  $e_n$

|             |             |           |
|-------------|-------------|-----------|
| 1.41828115  | 0.004312891 | 0.0055713 |
| 1.441643879 | 0.004242232 | 0.0053273 |
| 1.466673112 | 0.004841359 | 0.0056449 |
| 1.484668667 | 0.005081943 | 0.0057481 |
| 1.498242977 | 0.005386819 | 0.005844  |
| 1.532548396 | 0.005619933 | 0.005886  |
| 1.556295748 | 0.005449317 | 0.0059194 |
| 1.580631179 | 0.005361857 | 0.0058989 |
| 1.602207532 | 0.005034241 | 0.00575   |
| 1.624588253 | 0.004624578 | 5.49E-03  |
| 1.649684566 | 4.03E-03    | 4.89E-03  |
| 1.678146479 | 0.003723417 | 4.33E-03  |
| 1.703023248 | 0.003856155 | 0.0045301 |
| 1.727742817 | 0.003946593 | 0.004398  |
| 1.75534635  | 0.004060475 | 0.0042701 |
| 1.782440785 | 0.004090763 | 4.37E-03  |
| 1.806760373 | 0.003938908 | 4.33E-03  |
| 1.830570444 | 3.84E-03    | 4.25E-03  |
| 1.850125422 | 3.61E-03    | 3.68E-03  |
| 1.871256639 | 3.31E-03    | 3.84E-03  |
| 1.897966909 | 2.96E-03    | 3.54E-03  |
| 1.922948857 | 2.98E-03    | 3.16E-03  |
| 1.94990813  | 2.93E-03    | 3.06E-03  |
| 1.97651422  | 3.10E-03    | 3.01E-03  |
| 2.000486446 | 2.87E-03    | 2.92E-03  |
| 2.027442529 | 3.13E-03    | 2.85E-03  |
| 2.052249102 | 2.85E-03    | 2.66E-03  |
| 2.075385928 | 2.71E-03    | 2.53E-03  |
| 2.106100878 | 2.37E-03    | 1.84E-03  |

---

[d = 400 μm, a = 100 μm]

a = 100 μm: 7/17

Efficiency,  $e_n$

[d = 400 μm, a = 100 μm]

| Incidence angle, $\theta_{in}$<br>[mrad] | Efficiency, $e_n$ |           |
|------------------------------------------|-------------------|-----------|
|                                          | $n = -2$          | $n = -1$  |
| 0.414009739                              | 0                 | 0         |
| 0.43090234                               | 0                 | 0         |
| 0.44859202                               | 0                 | 0         |
| 0.46456                                  | 0                 | 0         |
| 0.481924359                              | 0                 | 0         |
| 0.496718161                              | 0                 | 0         |
| 0.514778142                              | 0                 | 0         |
| 0.540334642                              | 0                 | 0         |
| 0.564966571                              | 0                 | 0         |
| 0.58243771                               | 0                 | 0         |
| 0.611051929                              | 0                 | 0         |
| 0.637030818                              | 0                 | 0         |
| 0.658436646                              | 0                 | 0         |
| 0.674859935                              | 0                 | 0         |
| 0.70092302                               | 0                 | 0.00E+00  |
| 0.732666848                              | 0                 | 0         |
| 0.751390063                              | 0                 | 0         |
| 0.772685401                              | 0                 | 2.32E-04  |
| 0.786265704                              | 0                 | 0.0025613 |
| 0.830697716                              | 0                 | 0.0262285 |
| 0.850195186                              | 0                 | 0.0353086 |
| 0.871294423                              | 0                 | 0.0379956 |
| 0.882018596                              | 0                 | 0.0356313 |
| 0.919775614                              | 0                 | 0.0334976 |
| 0.941705473                              | 0                 | 0.0324789 |
| 0.962225174                              | 0                 | 0.0314555 |
| 0.981677584                              | 0                 | 0.0308889 |
| 1.012603985                              | 0                 | 0.0257841 |
| 1.037166455                              | 0                 | 0.0233597 |
| 1.048679037                              | 0.00E+00          | 0.0221246 |
| 1.076705479                              | 0                 | 0.0190635 |
| 1.106669049                              | 0                 | 0.0156144 |
| 1.128733213                              | 4.78E-04          | 0.0133657 |
| 1.140727563                              | 0.002566879       | 0.012182  |
| 1.180228501                              | 0.00985645        | 0.0121702 |
| 1.207267864                              | 0.011792973       | 0.0131486 |
| 1.228971977                              | 0.012129086       | 0.013714  |
| 1.236335972                              | 0.01311682        | 0.0144087 |
| 1.276919113                              | 0.012106976       | 0.014568  |
| 1.302342983                              | 0.011033998       | 0.0142548 |

[d = 400 μm, a = 100 μm]

a = 100 μm: 8/17

Efficiency,  $e_n$

|             |             |           |
|-------------|-------------|-----------|
| 1.325591652 | 0.010230918 | 0.0146144 |
| 1.336037739 | 0.00985669  | 0.0146727 |
| 1.372262421 | 0.008549035 | 0.0136566 |
| 1.404525842 | 0.006466865 | 0.0124435 |
| 1.421422044 | 0.005967049 | 0.0118315 |
| 1.44661474  | 0.005688831 | 0.0113255 |
| 1.468125838 | 0.005712698 | 0.0110401 |
| 1.491922658 | 0.005905156 | 0.0107302 |
| 1.498437944 | 0.005970756 | 0.0105771 |
| 1.527700994 | 0.006027197 | 1.01E-02  |
| 1.552801295 | 6.16E-03    | 9.83E-03  |
| 1.576636297 | 0.00624964  | 1.01E-02  |
| 1.599724007 | 0.006397733 | 0.0101469 |
| 1.623116729 | 0.006179955 | 0.0106287 |
| 1.643519352 | 0.005875575 | 0.0100629 |
| 1.664401943 | 0.005478267 | 9.52E-03  |
| 1.69203328  | 0.00507004  | 8.72E-03  |
| 1.718183136 | 4.95E-03    | 8.42E-03  |
| 1.747030951 | 4.68E-03    | 7.58E-03  |
| 1.763478364 | 4.62E-03    | 7.33E-03  |
| 1.797847641 | 4.50E-03    | 6.97E-03  |
| 1.818933475 | 4.77E-03    | 7.03E-03  |
| 1.839110787 | 4.78E-03    | 7.26E-03  |
| 1.870244214 | 4.66E-03    | 7.37E-03  |
| 1.89663733  | 4.33E-03    | 6.62E-03  |
| 1.918102377 | 4.01E-03    | 6.03E-03  |
| 1.939168554 | 4.46E-03    | 6.55E-03  |
| 1.968367887 | 3.75E-03    | 6.26E-03  |
| 1.987251567 | 3.66E-03    | 5.07E-03  |
| 1.996947806 | 0.00368915  | 0.0044195 |
| 2.0360878   | 0.003645395 | 0.0043965 |
| 2.059414993 | 0.003751168 | 0.003996  |
| 2.07026408  | 0.003655283 | 0.004314  |
| 2.111861142 | 0.003594195 | 0.0046763 |
| 2.135677113 | 0.003242805 | 0.0039717 |
| 2.146970193 | 0.003191992 | 0.0037228 |
| 2.187057101 | 0.003004117 | 0.0028922 |
| 2.208133964 | 0.003251601 | 0.0030494 |
| 2.228151736 | 0.002626419 | 0.0029744 |
| 2.260945712 | 0.002895442 | 0.0030323 |
| 2.278968864 | 0.002568983 | 0.0042473 |
| 2.302391718 | 0.004595366 | 0.003362  |
| 2.330986904 | 0.003246136 | 0.0034403 |



[d = 400  $\mu\text{m}$ , a = 100  $\mu\text{m}$ ]

a = 100  $\mu\text{m}$ : 9/17

Efficiency,  $e_n$

---

|             |  |             |           |
|-------------|--|-------------|-----------|
| 2.349882983 |  | 0.002448092 | 0.0038767 |
|-------------|--|-------------|-----------|

[d = 400  $\mu\text{m}$ , a = 300  $\mu\text{m}$ ]a = 300  $\mu\text{m}$ : 10/17Efficiency,  $e_n$ [d = 400  $\mu\text{m}$ , a = 300  $\mu\text{m}$ ]

| Incidence angle, $\theta_{\text{in}}$<br>[mrad] | $n = -2$          | $n = -1$  |
|-------------------------------------------------|-------------------|-----------|
|                                                 | Efficiency, $e_n$ |           |
| 0.481856291                                     | 0                 | 0         |
| 0.509111029                                     | 0                 | 0         |
| 0.543317136                                     | 0                 | 0         |
| 0.563806089                                     | 0                 | 0         |
| 0.589665484                                     | 0                 | 0         |
| 0.614450948                                     | 0                 | 0         |
| 0.634628185                                     | 0                 | 0         |
| 0.669251957                                     | 0                 | 0         |
| 0.691326624                                     | 0                 | 0         |
| 0.711945624                                     | 0                 | 0         |
| 0.731227384                                     | 0                 | 0         |
| 0.76161835                                      | 0                 | 0         |
| 0.784994395                                     | 0                 | 0         |
| 0.808399178                                     | 0                 | 8.42E-04  |
| 0.842709645                                     | 0                 | 4.34E-03  |
| 0.860585608                                     | 0                 | 0.0056413 |
| 0.87937415                                      | 0                 | 0.0066458 |
| 0.917995034                                     | 0                 | 0.0080664 |
| 0.932191255                                     | 0                 | 0.0090165 |
| 0.94993327                                      | 0                 | 0.0096393 |
| 0.977456288                                     | 0                 | 0.0104716 |
| 1.010844478                                     | 0                 | 0.0110793 |
| 1.029116249                                     | 0                 | 0.0116591 |
| 1.04838092                                      | 0                 | 0.012224  |
| 1.08465843                                      | 0                 | 0.0127675 |
| 1.098794439                                     | 0                 | 0.013035  |
| 1.122071718                                     | 0                 | 0.0135559 |
| 1.160914789                                     | 0.002177084       | 0.0142001 |
| 1.178058831                                     | 0.004377596       | 0.0140206 |
| 1.197655768                                     | 5.75E-03          | 0.0138379 |
| 1.23367083                                      | 0.006707199       | 0.014437  |
| 1.25455949                                      | 0.007401832       | 0.013703  |
| 1.278997199                                     | 0.007832794       | 0.0140123 |
| 1.297851927                                     | 0.007725035       | 0.0138318 |
| 1.309985732                                     | 0.007920806       | 0.0134657 |
| 1.346748421                                     | 0.008419175       | 0.0134782 |
| 1.369752401                                     | 0.008419096       | 0.0131491 |
| 1.392661556                                     | 0.00882008        | 0.0133396 |
| 1.413922718                                     | 0.008712027       | 0.0126062 |
| 1.430186262                                     | 0.008689573       | 0.012192  |

Efficiency,  $e_n$ 

|             |             |           |
|-------------|-------------|-----------|
| 1.453925648 | 0.008203763 | 0.0117537 |
| 1.479222883 | 0.008122151 | 0.0113923 |
| 1.50744381  | 0.007803238 | 0.0110913 |
| 1.534268341 | 0.007382746 | 0.0105991 |
| 1.558526946 | 0.007182215 | 0.0101516 |
| 1.580724417 | 0.007063154 | 0.0098692 |
| 1.607314465 | 0.00675576  | 0.0095238 |
| 1.630257971 | 0.006508684 | 0.0087785 |
| 1.653725104 | 0.00622125  | 0.0084832 |
| 1.67962627  | 0.005788696 | 8.41E-03  |
| 1.705963715 | 5.45E-03    | 7.91E-03  |
| 1.728269466 | 0.005216951 | 8.16E-03  |
| 1.752108232 | 0.004953644 | 0.0073646 |
| 1.775877597 | 0.004791442 | 0.0073136 |
| 1.800130311 | 0.004548651 | 0.0072742 |
| 1.825488519 | 0.004289987 | 7.13E-03  |
| 1.853799535 | 0.004143888 | 7.10E-03  |
| 1.879802113 | 4.13E-03    | 0.00E+00  |
| 1.889558157 | 3.97E-03    | 0.00E+00  |
| 1.925846535 | 3.89E-03    | 0.00E+00  |
| 1.945134116 | 3.71E-03    | 0.00E+00  |
| 1.970135707 | 3.60E-03    | 0.00E+00  |
| 1.995447131 | 3.51E-03    | 0.00E+00  |
| 2.011174684 | 3.38E-03    | 0.00E+00  |
| 2.044187891 | 3.50E-03    | 0.00E+00  |
| 2.064674464 | 3.27E-03    | 0.00E+00  |
| 2.088552013 | 3.34E-03    | 0.00E+00  |
| 2.111357541 | 3.47E-03    | 0.00E+00  |
| 2.145797028 | 3.24E-03    | 0.00E+00  |
| 2.166290918 | 0.003494695 | 0         |
| 2.187213341 | 0.003520164 | 0         |
| 2.210185986 | 0.003118171 | 0         |
| 2.243346601 | 0.003218655 | 0         |
| 2.265110554 | 0.003245425 | 0         |
| 2.290257051 | 0.003045152 | 0         |
| 2.316370471 | 0.003018077 | 0         |
| 2.338037125 | 0.003060412 | 0         |
| 2.375848917 | 0.003085045 | 0         |

---

[d = 400  $\mu\text{m}$ , a = 330  $\mu\text{m}$ ]a = 330  $\mu\text{m}$ : 12/17Efficiency,  $e_n$ [d = 400  $\mu\text{m}$ , a = 330  $\mu\text{m}$ ]

| Incidence angle, $\theta_{\text{in}}$<br>[mrad] | $n = -2$          | $n = -1$  |
|-------------------------------------------------|-------------------|-----------|
|                                                 | Efficiency, $e_n$ |           |
| 0.483488478                                     | 0                 | 0         |
| 0.5013971                                       | 0                 | 0         |
| 0.522249374                                     | 0                 | 0         |
| 0.547009325                                     | 0                 | 0         |
| 0.576310654                                     | 0                 | 0         |
| 0.595488252                                     | 0                 | 0         |
| 0.617544017                                     | 0                 | 0         |
| 0.639785782                                     | 0                 | 0         |
| 0.670117219                                     | 0                 | 0         |
| 0.688873435                                     | 0                 | 0         |
| 0.712742658                                     | 0                 | 0         |
| 0.735033609                                     | 0                 | 0         |
| 0.766568799                                     | 0                 | 0         |
| 0.7873996                                       | 0                 | 0         |
| 0.810540818                                     | 0                 | 2.06E-04  |
| 0.830315499                                     | 0                 | 0.001238  |
| 0.863388651                                     | 0                 | 0.0024512 |
| 0.8824283                                       | 0                 | 0.0030761 |
| 0.90365179                                      | 0                 | 0.0035532 |
| 0.938000671                                     | 0                 | 0.0042956 |
| 0.95823857                                      | 0                 | 0.0043309 |
| 0.97856939                                      | 0                 | 0.0047871 |
| 1.000014345                                     | 0                 | 0.0049932 |
| 1.037487423                                     | 0                 | 0.0054345 |
| 1.05655195                                      | 0                 | 0.0058281 |
| 1.07821371                                      | 0                 | 0.0059002 |
| 1.104035784                                     | 0                 | 0.0062208 |
| 1.121700999                                     | 0                 | 0.0061854 |
| 1.164683794                                     | 8.42E-04          | 0.0069412 |
| 1.189315424                                     | 2.42E-03          | 0.0070499 |
| 1.210075881                                     | 0.003176003       | 0.0072015 |
| 1.230470703                                     | 0.003713664       | 0.0071983 |
| 1.255509808                                     | 0.004472139       | 0.0069488 |
| 1.290667564                                     | 0.004680916       | 0.0072472 |
| 1.312212018                                     | 0.005113831       | 0.0070756 |
| 1.334695333                                     | 0.005451783       | 0.0071162 |
| 1.355899789                                     | 0.005648231       | 0.0069646 |
| 1.377243133                                     | 0.005881939       | 0.0069685 |
| 1.417911156                                     | 0.006077245       | 0.0074052 |
| 1.438208821                                     | 0.006190288       | 0.0071734 |

Efficiency,  $e_n$ 

|             |             |           |
|-------------|-------------|-----------|
| 1.451491231 | 0.006269103 | 0.0068518 |
| 1.468946609 | 0.006157163 | 0.0065642 |
| 1.497612153 | 0.006192424 | 0.0064596 |
| 1.530820013 | 0.006243695 | 0.0063646 |
| 1.549339746 | 0.006286626 | 0.0063317 |
| 1.575072733 | 0.006327006 | 0.0064598 |
| 1.599044251 | 0.006189676 | 0.0063401 |
| 1.640425955 | 0.005960515 | 0.0061812 |
| 1.658235748 | 0.005960879 | 0.0060511 |
| 1.68452993  | 0.005686353 | 5.88E-03  |
| 1.710865781 | 5.69E-03    | 5.63E-03  |
| 1.747020252 | 0.005385354 | 5.37E-03  |
| 1.766590921 | 0.005251165 | 0         |
| 1.791637202 | 0.005067    | 0         |
| 1.814976602 | 0.004887933 | 0         |
| 1.835267436 | 0.00459499  | 0.00E+00  |
| 1.870898148 | 0.004296957 | 0.00E+00  |
| 1.894247413 | 4.13E-03    | 0.00E+00  |
| 1.917610482 | 3.96E-03    | 0.00E+00  |
| 1.936347577 | 3.92E-03    | 0.00E+00  |
| 1.97449872  | 3.69E-03    | 0.00E+00  |
| 1.994564388 | 3.48E-03    | 0.00E+00  |
| 2.016382882 | 3.18E-03    | 0.00E+00  |
| 2.050260296 | 3.51E-03    | 0.00E+00  |
| 2.069319069 | 3.17E-03    | 0.00E+00  |
| 2.089197047 | 3.10E-03    | 0.00E+00  |
| 2.124622423 | 2.63E-03    | 0.00E+00  |
| 2.144666886 | 2.73E-03    | 0.00E+00  |
| 2.167082385 | 2.61E-03    | 0.00E+00  |
| 2.187116231 | 0.002572384 | 0         |
| 2.227845469 | 0.002137629 | 0         |
| 2.248833404 | 0.002319849 | 0         |
| 2.270072807 | 0.001754387 | 0         |
| 2.306185386 | 0.001870434 | 0         |
| 2.32470135  | 0.002088946 | 0         |
| 2.347758131 | 0.002050596 | 0         |
| 2.373337307 | 0.002091891 | 0         |
| 2.409185897 | 0.0021342   | 0         |

---

[d = 400 μm, a = 370 μm]

a = 370 μm: 14/17

Efficiency,  $e_n$

[d = 400 μm, a = 370 μm]

| Incidence angle, $\theta_{in}$<br>[mrad] | $n = -2$          | $n = -1$  |
|------------------------------------------|-------------------|-----------|
|                                          | Efficiency, $e_n$ |           |
| 0.471119154                              | 0                 | 0         |
| 0.498222294                              | 0                 | 0         |
| 0.522284326                              | 0                 | 0         |
| 0.54240268                               | 0                 | 0         |
| 0.574847872                              | 0                 | 0         |
| 0.598696309                              | 0                 | 0         |
| 0.621048988                              | 0                 | 0         |
| 0.647272458                              | 0                 | 0         |
| 0.670324633                              | 0                 | 0         |
| 0.699642606                              | 0                 | 0         |
| 0.722408044                              | 0                 | 0         |
| 0.746448576                              | 0                 | 0         |
| 0.776729895                              | 0                 | 0         |
| 0.79906536                               | 0                 | 0         |
| 0.820479819                              | 0                 | 1.02E-04  |
| 0.844285587                              | 0                 | 2.56E-04  |
| 0.86283825                               | 0                 | 4.73E-04  |
| 0.901079084                              | 0                 | 6.20E-04  |
| 0.924165762                              | 0                 | 6.04E-04  |
| 0.947507154                              | 0                 | 7.17E-04  |
| 0.96395082                               | 0                 | 7.40E-04  |
| 1.002675678                              | 0                 | 8.71E-04  |
| 1.026130737                              | 0                 | 8.97E-04  |
| 1.047332743                              | 0                 | 0.0010282 |
| 1.062125631                              | 0                 | 9.60E-04  |
| 1.099822135                              | 0                 | 0.0011092 |
| 1.123144303                              | 0                 | 0.001123  |
| 1.146162658                              | 0                 | 0.0011205 |
| 1.161598983                              | 1.35E-04          | 0.0010891 |
| 1.197270324                              | 3.13E-04          | 0.0013627 |
| 1.222148919                              | 4.41E-04          | 0.0013613 |
| 1.243763025                              | 5.32E-04          | 0.0014286 |
| 1.258500696                              | 5.85E-04          | 0.00145   |
| 1.295441956                              | 6.84E-04          | 0.001498  |
| 1.318353256                              | 6.97E-04          | 0.0015153 |
| 1.34238396                               | 7.73E-04          | 0.0015619 |
| 1.362136322                              | 8.47E-04          | 0.0014192 |
| 1.391395366                              | 8.78E-04          | 0.0015169 |
| 1.418678489                              | 9.37E-04          | 0.0015363 |
| 1.43592061                               | 9.68E-04          | 0.0015477 |

[d = 400  $\mu\text{m}$ , a = 370  $\mu\text{m}$ ]

a = 370  $\mu\text{m}$ : 15/17

Efficiency,  $e_n$

|             |             |           |
|-------------|-------------|-----------|
| 1.457507168 | 0.001019065 | 0.0015564 |
| 1.49058442  | 0.001000549 | 0.0017331 |
| 1.514901169 | 0.001033605 | 0.0017564 |
| 1.535749403 | 0.001055334 | 0.002257  |
| 1.559520592 | 0.001144016 | 0.0020374 |
| 1.579800841 | 0.001184081 | 0         |
| 1.601609711 | 0.001114022 | 0         |
| 1.614723354 | 0.001117743 | 0         |
| 1.641275008 | 0.001100219 | 0         |
| 1.668481872 | 0.001144587 | 0.00E+00  |
| 1.69199938  | 1.21E-03    | 0.00E+00  |
| 1.715757209 | 0.001210218 | 0.00E+00  |
| 1.740648018 | 0.001255002 | 0         |
| 1.767656003 | 0.001173555 | 0         |
| 1.791434996 | 0.001233216 | 0         |
| 1.815492584 | 0.001134135 | 0.00E+00  |
| 1.841042868 | 0.001148629 | 0.00E+00  |
| 1.879534712 | 1.14E-03    | 0.00E+00  |
| 1.904090793 | 1.16E-03    | 0.00E+00  |
| 1.929630467 | 1.13E-03    | 0.00E+00  |
| 1.953535999 | 1.09E-03    | 0.00E+00  |
| 1.977914686 | 1.07E-03    | 0.00E+00  |
| 2.002524875 | 1.05E-03    | 0.00E+00  |
| 2.027796215 | 1.12E-03    | 0.00E+00  |
| 2.051627699 | 9.91E-04    | 0.00E+00  |
| 2.07289716  | 8.81E-04    | 0.00E+00  |

---

[d = 400 μm, a = 390 μm]

a = 390 μm: 16/17

Efficiency,  $e_n$

[d = 400 μm, a = 390 μm]

| Incidence angle, $\theta_{in}$<br>[mrad] | $n = -2$          | $n = -1$ |
|------------------------------------------|-------------------|----------|
|                                          | Efficiency, $e_n$ |          |
| 0.44287647                               | 0                 | 0        |
| 0.469489112                              | 0                 | 0        |
| 0.492241186                              | 0                 | 0        |
| 0.50552938                               | 0                 | 0        |
| 0.534599992                              | 0                 | 0        |
| 0.562315825                              | 0                 | 0        |
| 0.585001214                              | 0                 | 0        |
| 0.606422341                              | 0                 | 0        |
| 0.620689798                              | 0                 | 0        |
| 0.657735514                              | 0                 | 0        |
| 0.681704445                              | 0                 | 0        |
| 0.704626349                              | 0                 | 0        |
| 0.721273001                              | 0                 | 0        |
| 0.746890747                              | 0                 | 0        |
| 0.782449489                              | 0                 | 0.00E+00 |
| 0.808390875                              | 0                 | 0        |
| 0.832965981                              | 0                 | 0        |
| 0.840863269                              | 0                 | 0        |
| 0.878969808                              | 0                 | 0        |
| 0.907685962                              | 0                 | 0        |
| 0.934130019                              | 0                 | 9.96E-05 |
| 0.959364222                              | 0                 | 0        |
| 0.976727324                              | 0                 | 0        |
| 0.990412747                              | 0                 | 1.95E-04 |
| 1.038502448                              | 0                 | 1.71E-04 |
| 1.066880916                              | 0                 | 1.64E-04 |
| 1.09339039                               | 0                 | 1.86E-04 |
| 1.101108241                              | 0                 | 1.56E-04 |
| 1.134698273                              | 0                 | 1.59E-04 |
| 1.171400641                              | 0.00E+00          | 2.36E-04 |
| 1.195100309                              | 0                 | 2.25E-04 |
| 1.22073768                               | 0                 | 2.22E-04 |
| 1.223563329                              | 4.56E-05          | 2.69E-04 |
| 1.267407578                              | 3.77E-05          | 1.93E-04 |
| 1.297147357                              | 4.21E-05          | 2.87E-04 |
| 1.319380643                              | 6.91E-05          | 0        |
| 1.343000221                              | 1.04E-04          | 2.93E-04 |
| 1.369260217                              | 5.06E-05          | 0        |
| 1.379070013                              | 1.30E-04          | 0        |
| 1.417889273                              | 8.56E-05          | 0        |



[d = 400  $\mu\text{m}$ , a = 390  $\mu\text{m}$ ]

a = 390  $\mu\text{m}$ : 17/17

Efficiency,  $e_n$

|             |          |   |
|-------------|----------|---|
| 1.451018615 | 9.94E-05 | 0 |
| 1.475003586 | 5.35E-05 | 0 |
| 1.500513143 | 1.30E-04 | 0 |
| 1.525007304 | 1.26E-04 | 0 |
| 1.546521948 | 1.26E-04 | 0 |
| 1.554447993 | 1.51E-04 | 0 |
| 1.59794669  | 1.20E-04 | 0 |
| 1.6264244   | 1.31E-04 | 0 |
| 1.652056914 | 1.54E-04 | 0 |
| 1.680593951 | 1.67E-04 | 0 |
| 1.705807441 | 0        | 0 |
| 1.721122342 | 0        | 0 |
| 1.753004917 | 0        | 0 |
| 1.789513583 | 0        | 0 |
| 1.815335375 | 0        | 0 |
| 1.8391887   | 0        | 0 |
| 1.86177458  | 0        | 0 |
| 1.888587958 | 0        | 0 |
| 1.913902681 | 0        | 0 |
| 1.92334895  | 0        | 0 |
| 1.961373428 | 0        | 0 |
| 1.997204345 | 0        | 0 |
| 2.024283194 | 0        | 0 |
| 2.048013186 | 0        | 0 |
| 2.069921929 | 0        | 0 |

---
